# Supplementary figures and images for: Impaired Very‐Low‐Density Lipoprotein catabolism links hypoglycemia to hypertriglyceridemia in Glycogen Storage Disease type Ia
Source: PubMed Central journal article supplement — J Inherit Metab Dis. 2021 Apr 7;44(4):879–92. doi: 10.1002/jimd.12380 (PMC8360207; doi:10.1002/jimd.12380), 2021-04-07

**Figure S3**

Normoglycemic L-G6pc<sup>-/-</sup> mice

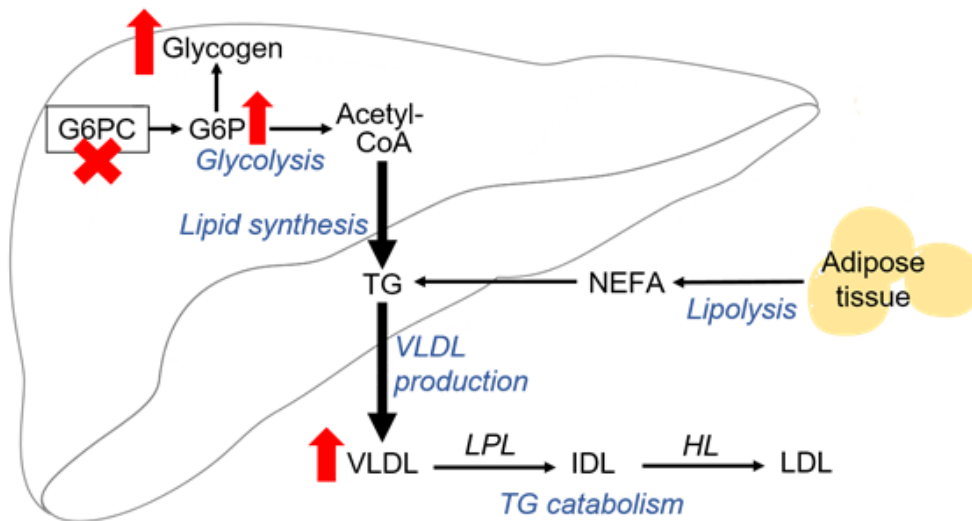

Hypoglycemic L-G6pc<sup>-/-</sup> mice

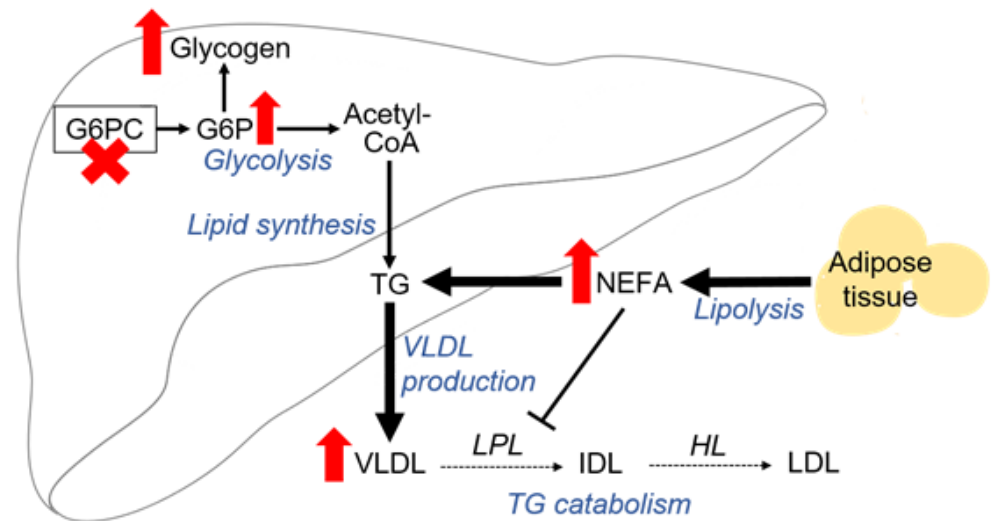

Supplement: JIMD-44-879-s001.pdf [file JIMD-44-879-s001.pdf]

# Figure S2

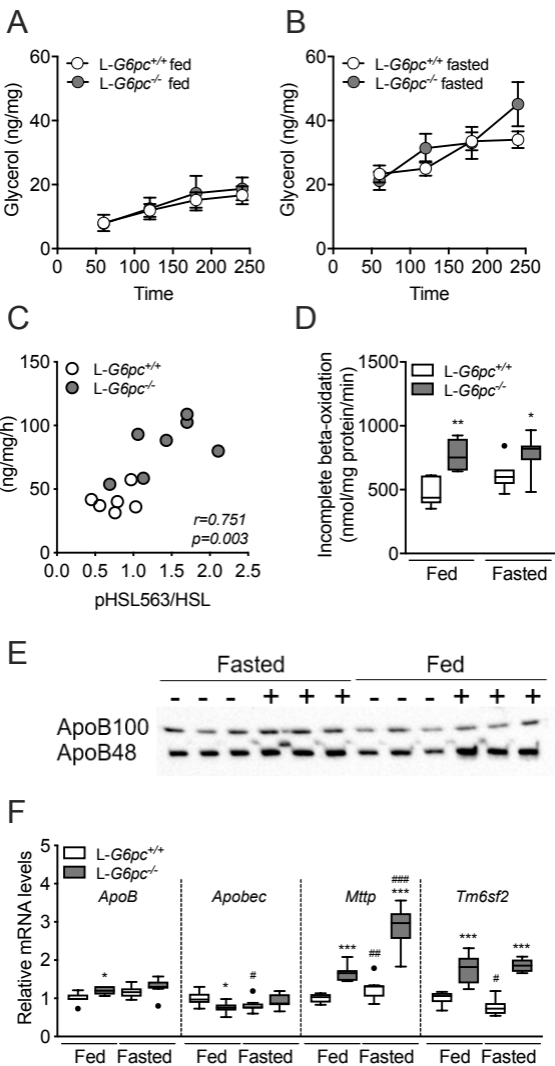

Supplement: JIMD-44-879-s009.pdf [file JIMD-44-879-s009.pdf]
